# Supplementary material for: Mechanical force-driven TNFα endocytosis governs stem cell homeostasis
Source: PubMed Central journal article supplement (PMC7775432; doi:10.1038/s41413-020-00117-x), 2021-01-01
Supplement: 41413_2020_117_MOESM1_ESM.pdf [file 41413_2020_117_MOESM1_ESM.pdf]

1 Supplemental Figures and Figure Legends

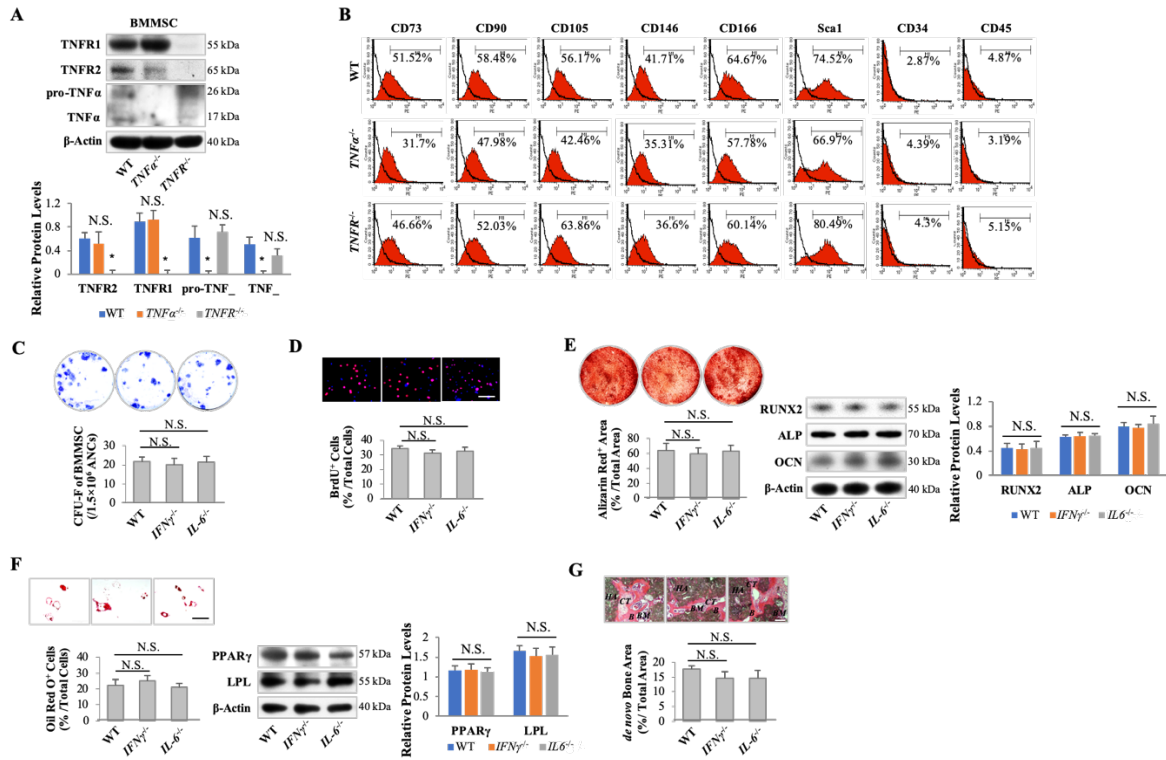

2

3 **Fig. S1. Characterization of MSCs derived from the genetic mouse models. (A)** Western blot

4 analyses of *TNFα* and *TNFR* gene knockout efficiency (***N* = 3**). **(B)** Flow cytometric analyses of surface

5 markers of MSCs derived from WT, *TNFα*<sup>-/-</sup> and *TNFR*<sup>-/-</sup> mice (***N* = 3**). **(C-G)** Functional analyses of

6 MSCs according to CFU, BrdU labeling, osteogenic and adipogenic differentiation, and ectopic tissue

7 formation. MSCs were derived from WT, *IFNγ*<sup>-/-</sup> or *IL-6*<sup>-/-</sup> mice (***N* = 3**). B, bone; CT, connective tissue;

8 BM, bone marrow; HA, implanted scaffolds. Scale bars = 100 μm. **For quantification of Western blotting,**

9 **two-tailed Student t test was used for the comparison between treatment and WT group.** N.S., not

10 significant. Data represent mean ± SD.

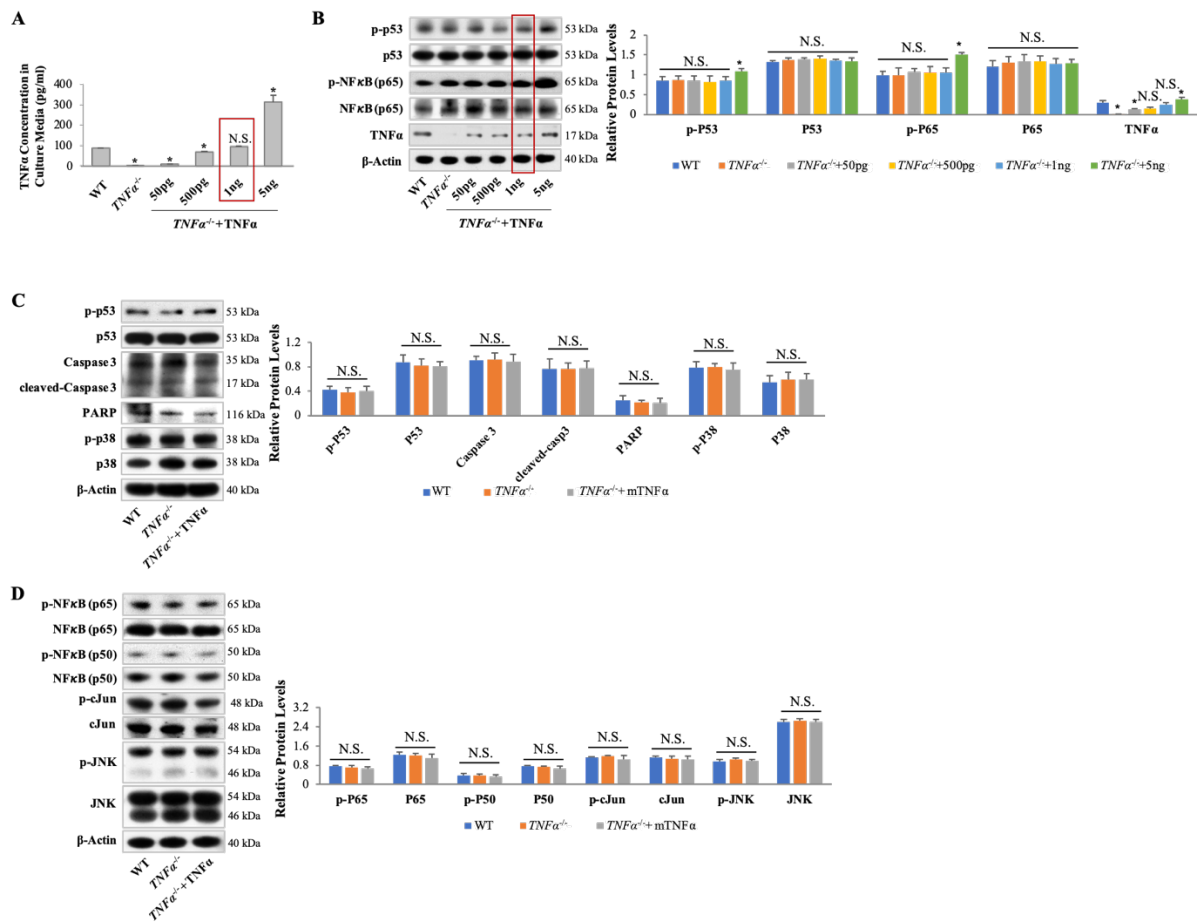

1  
 2 **Fig. S2. Physiological level of TNFα does not induce receptor-mediated signaling responses. (A)**  
 3 **ELISA analysis of secreted TNFα levels by MSCs. *N* = 3. TNFα was added at different doses. (B)**  
 4 **Western blot analyses of TNFR downstream signaling. *N* = 3. TNFα was added at different doses. (C,**  
 5 **D) Western blot analyses of TNFR downstream signaling. *N* = 3. TNFα was added at 1 ng/ml. For**  
 6 **quantification of Western blotting, two-tailed Student t test was used for the comparison between**  
 7 **treatment and WT group. \*, *P* < 0.05. N.S., not significant. Data represent mean ± SD.**

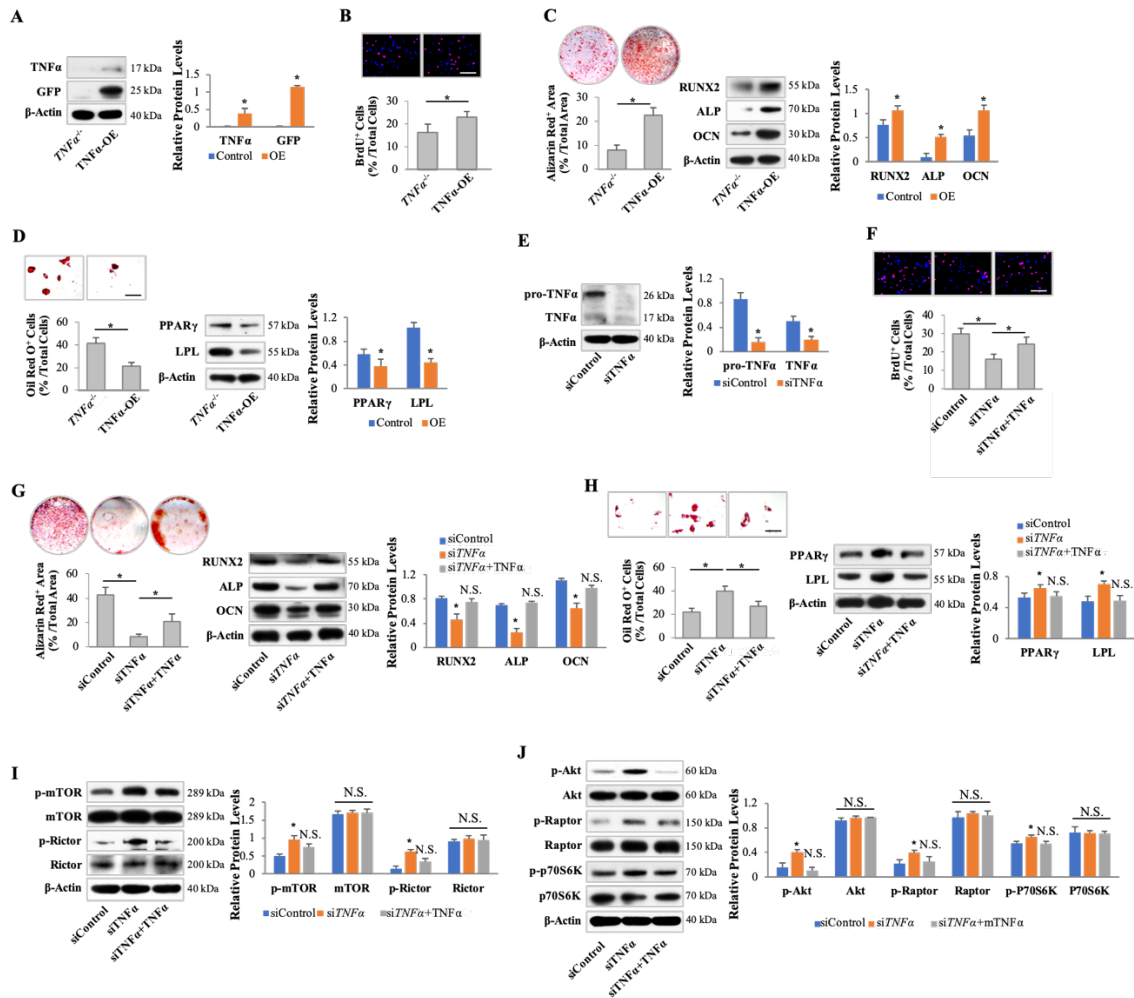

1  
2  
3  
4  
5  
6  
7  
8  
9

**Fig. S3. TNFα regulates MSC homeostasis *in vitro*.** (A) Western blot analysis of TNFα overexpression (OE) efficiency in *TNFα*<sup>-/-</sup> MSCs (N = 3). (B-D) Functional analyses of MSCs according to BrdU labeling, osteogenic and adipogenic differentiation (N = 3). (E) Western blot analysis of TNFα knockdown efficiency in WT MSCs (N = 3). (F-H) Functional analyses of MSCs according to BrdU labeling, osteogenic and adipogenic differentiation. N = 3. TNFα was added at 1 ng/ml. (I, J) Western blot analyses of mTOR signaling (N = 3). For quantification of Western blotting, two-tailed Student t test was used for the comparison between treatment and control group. \*, P < 0.05. N.S., not significant. Data represent mean ± SD.

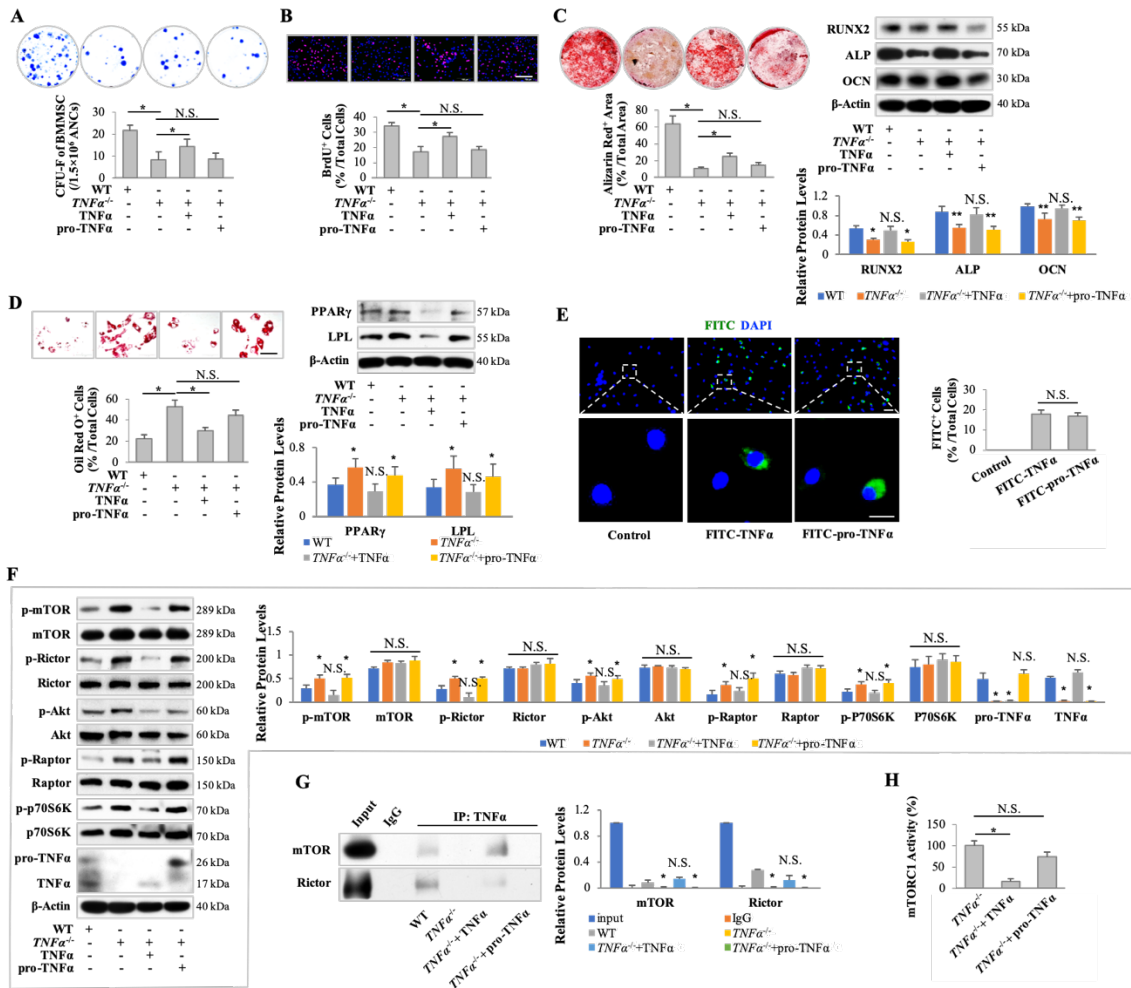

1

2 **Fig. S4. Pro-TNFα fails to regulate MSC function despite endocytosis. (A-D) Functional analyses**

3 **of MSCs according to CFU, BrdU labeling, osteogenic and adipogenic differentiation.  $N = 3$ . Scale bars**

4  **$= 100 \mu\text{m}$ . (E) Endocytosis analysis of FITC-labeled TNFα or pro-TNFα uptake by MSCs for 24 h *in***

5 ***vitro*.  $N = 3$ . Scale bars = 20  $\mu\text{m}$  (up) and 7  $\mu\text{m}$  (bottom). (F) Western blot analyses of mTOR signaling**

6 **( $N = 3$ ). (G) Co-IP analysis of binding of TNFα and pro-TNFα to mTOR complex components ( $N = 3$ ).**

7 **(H) Analysis of mTORC1 activity using an ELISA-based assay ( $N = 3$ ). TNFα and pro-TNFα were added**

8 **at 1 ng/ml, respectively. For quantification of Western blotting, two-tailed Student t test was used for the**

9 **comparison between treatment and WT group. \*,  $P < 0.05$ . N.S., not significant. Data represent mean  $\pm$**

10 **SD.**

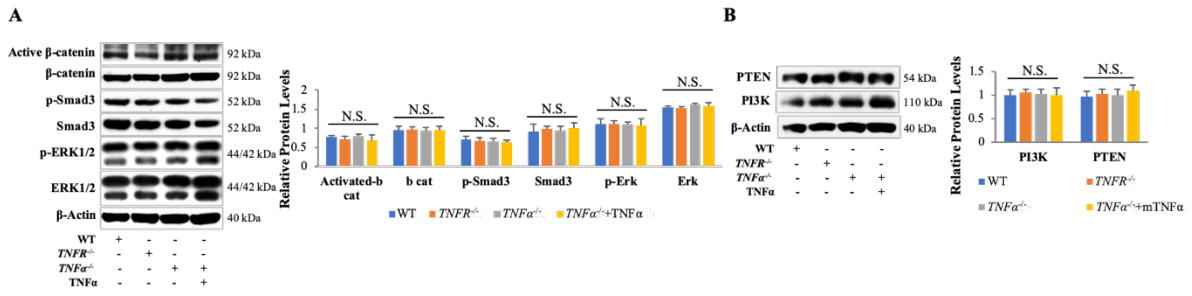

1

2 **Fig. S5. TNFα exerts limited effects on canonical Wnt, TGF-β or ERK pathways, nor the PI3K**

3 **pathway upstream of Akt. (A, B) Western blot analyses of multiple signaling pathways in MSCs. *N* =**

4 **3. TNFα was added at 1 ng/ml. For quantification of Western blotting, two-tailed Student t test was used**

5 **for the comparison between treatment and WT group. \*, *P* < 0.05. N.S., not significant. Data represent**

6 **mean ± SD.**

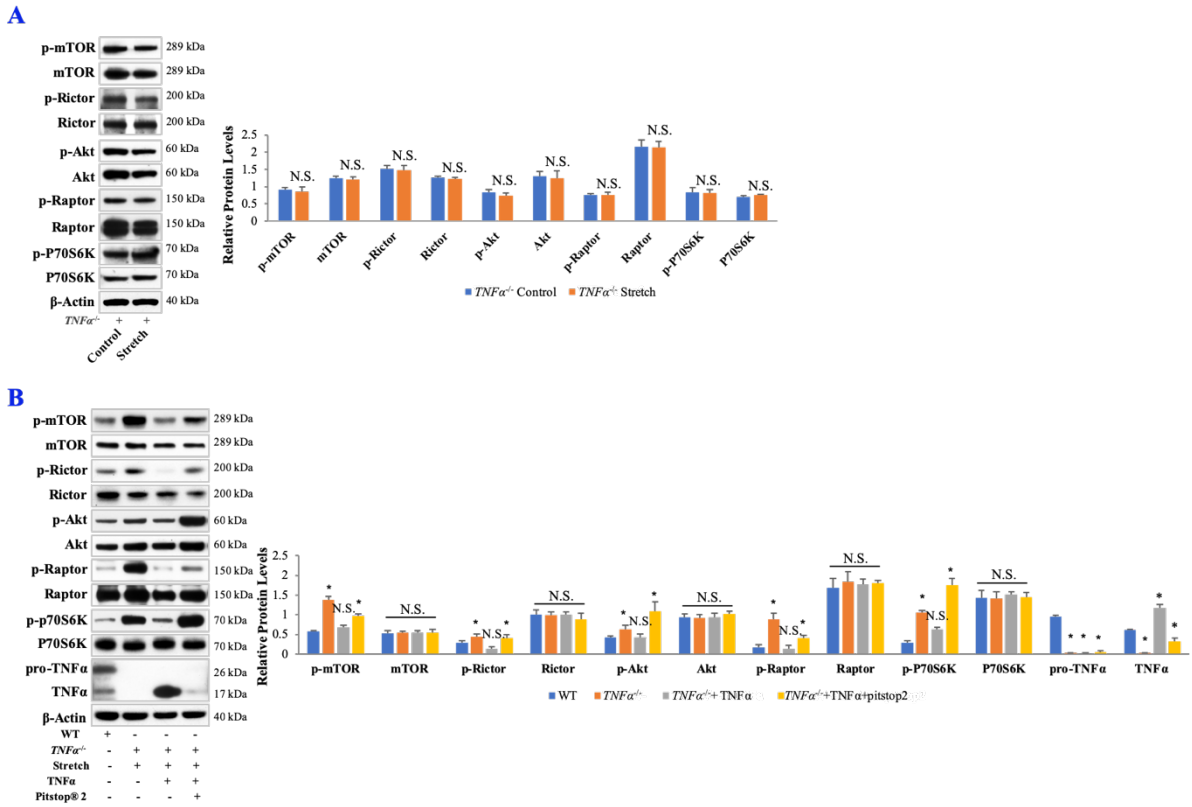

1

2

**Fig. S6. Mechanical stretching restrains mTOR signaling via TNFα endocytosis. (A, B) Western**

3

blot analysis of mTOR signaling in MSCs. *N* = 3. TNFα and Pitstop® 2 were added at 1 ng/ml and 12

4

μM, respectively. For quantification of Western blotting, two-tailed Student t test was used for the

5

comparison between treatment and WT/control group. \*, *P* < 0.05. N.S., not significant. Data represent

6

mean ± SD.
